# Supplementary material for: Localizing potentially active post-transcriptional regulations in the Ewing's sarcoma gene regulatory network
Source: Springer Nature journal article supplement (doi:10.1186/1752-0509-4-146), 2010-11-02

◆ FASLG      ▲ IGF2      ● EWS-FLI1  
◇ FASLG recovery      △ IGF2 recovery      ○ EWS-FLI1 recovery

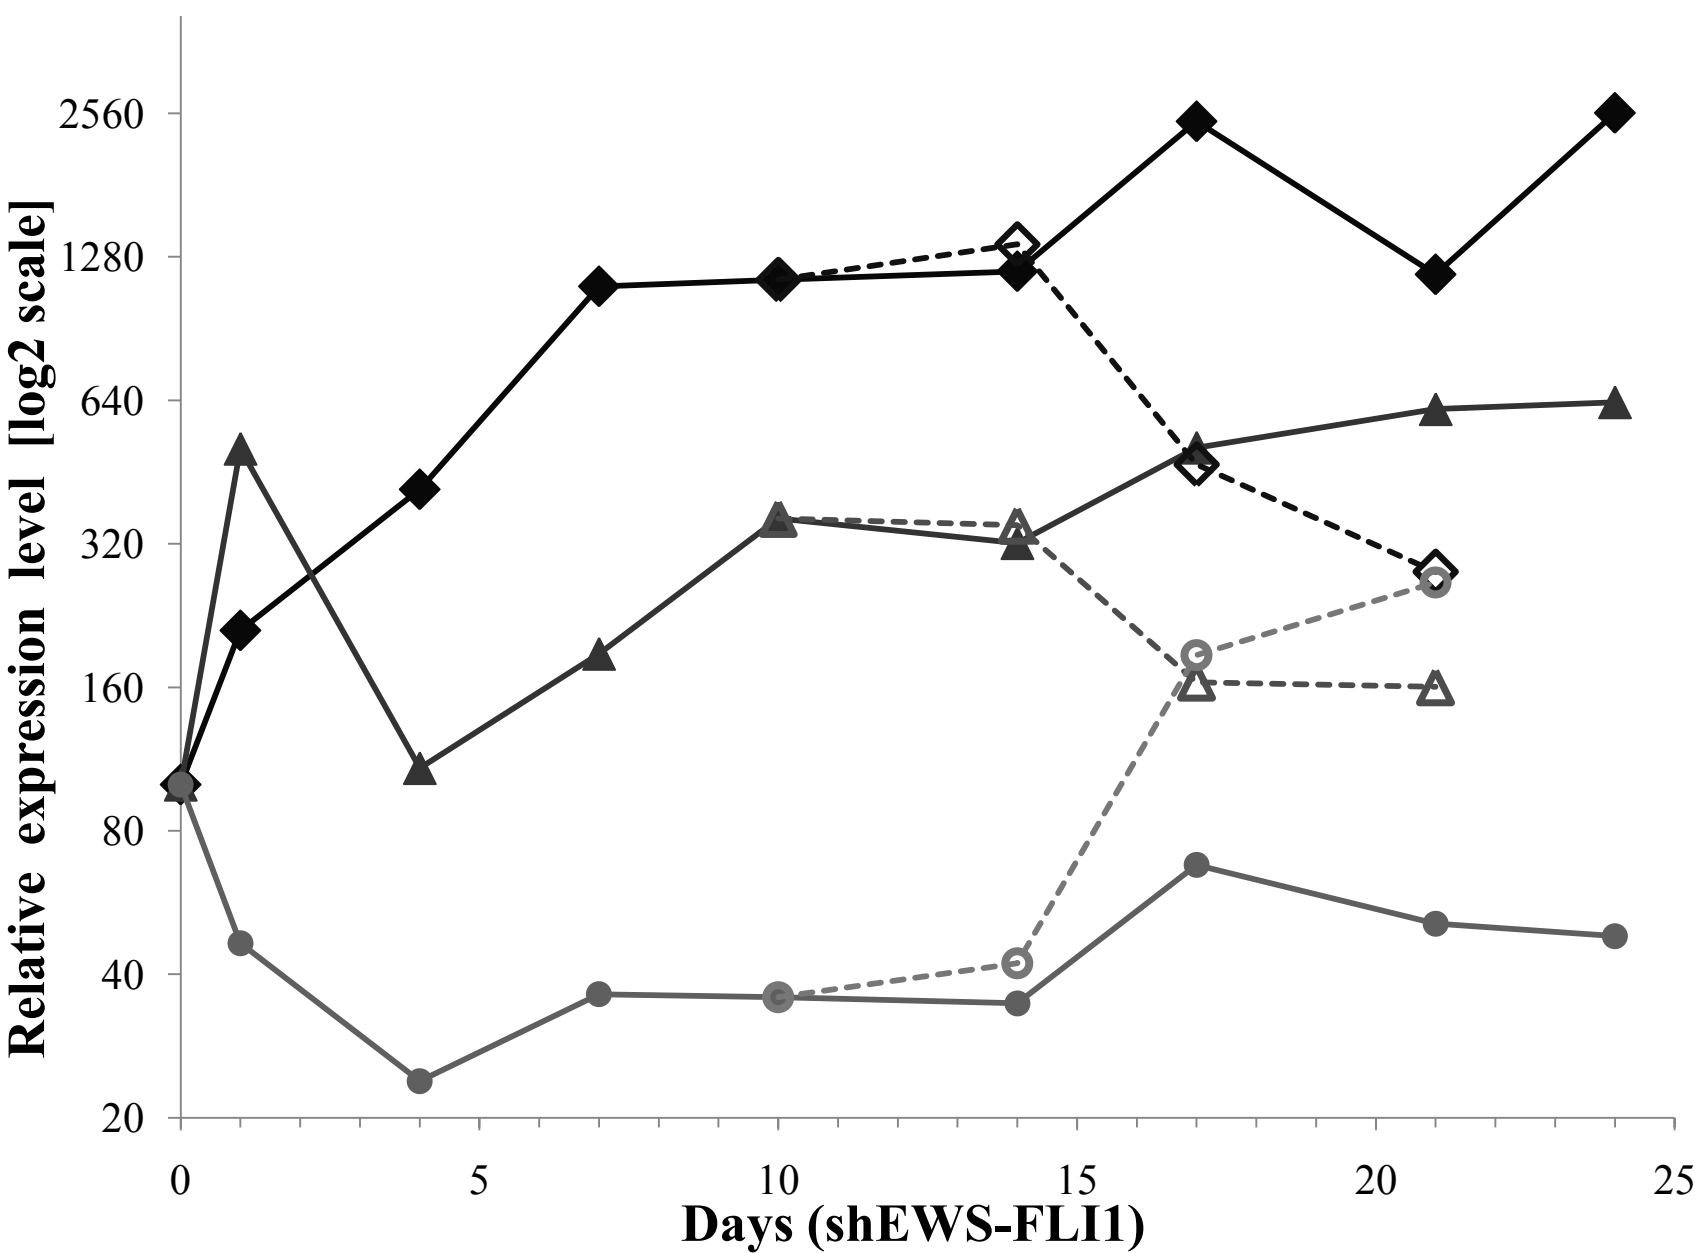

Supplement: 12918_2010_557_MOESM10_ESM.pdf [file 12918_2010_557_MOESM10_ESM.pdf]
